# Supplementary material for: Trends in incidence of proximal humerus fractures, surgical procedures and outcomes among elderly hospitalized patients with and without type 2 diabetes in Spain (2001–2013)
Source: Springer Nature journal article supplement (doi:10.1186/s12891-017-1892-7), 2017-12-01
Supplement: MOESM5 [file 15296118]

Supplementary table 1. Procedures and outcomes of hospital discharges due to proximal humerus fracture among men and women with and without type 2 diabetes in Spain, 2001-2013

|                                    | 2001        | 2002      | 2003      | 2004      | 2005      | 2006      | 2007      | 2008      | 2009      | 2010      | 2011      | 2012      | 2013      | Total       |
|------------------------------------|-------------|-----------|-----------|-----------|-----------|-----------|-----------|-----------|-----------|-----------|-----------|-----------|-----------|-------------|
| <b>MEN WITHOUT T2DM</b>            |             |           |           |           |           |           |           |           |           |           |           |           |           |             |
| Arthroplasty, n (%) <sup>ba</sup>  | 27(8.4)     | 47(13.4)  | 38(10.6)  | 47(12.2)  | 57(13.2)  | 58(13.3)  | 58(12.6)  | 66(12.2)  | 80(13.9)  | 99(16.9)  | 72(13.6)  | 105(16.9) | 115(19.3) | 869(14.0)   |
| ORIF, n (%) <sup>a</sup>           | 41(12.8)    | 50(14.3)  | 52(14.6)  | 73(19.0)  | 109(25.3) | 90(20.6)  | 113(24.5) | 161(29.7) | 152(26.5) | 181(30.6) | 189(35.7) | 195(31.4) | 191(32.1) | 1597(25.8)  |
| CRIF, n (%) <sup>a</sup>           | 76(23.8)    | 86(24.6)  | 98(27.5)  | 98(25.5)  | 97(22.5)  | 111(25.5) | 104(22.6) | 105(19.3) | 118(20.6) | 102(17.3) | 105(19.8) | 105(16.9) | 94(15.8)  | 1299(21.0)  |
| NON-OPERATIVE, n (%) <sup>a</sup>  | 177(55.3)   | 169(48.3) | 170(47.6) | 169(44.0) | 170(39.4) | 183(42.0) | 189(41.0) | 217(40.0) | 227(39.5) | 211(35.7) | 168(31.7) | 222(35.7) | 199(33.4) | 2471(39.2)  |
| IHM, n (%)                         | 6(1.9)      | 9(2.6)    | 8(2.2)    | 7(1.8)    | 14(3.2)   | 16(3.7)   | 9(2.0)    | 13(2.4)   | 13(2.3)   | 12(2.0)   | 8(1.5)    | 16(2.6)   | 8(1.3)    | 139(2.2)    |
| LOHS, median (IRQ) <sup>a</sup>    | 5(2-11)     | 5(3-10)   | 6(2-11)   | 5.5(3-11) | 6(3-11)   | 6(3-10.7) | 6(3-10)   | 6(3-11)   | 5(2-10)   | 5(3-9)    | 5(3-9)    | 4(2-8)    | 4(2-9)    | 5(2-10)     |
| <b>MEN WITH T2DM</b>               |             |           |           |           |           |           |           |           |           |           |           |           |           |             |
| Arthroplasty, n (%)                | 6(14.3)     | 5(11.9)   | 4(6.6)    | 7(11.9)   | 8(10.4)   | 8(9.9)    | 10(11.1)  | 18(17.1)  | 13(11.3)  | 15(11.4)  | 13(8.8)   | 17(11.5)  | 19(12.8)  | 143(11.5)   |
| ORIF, n (%) <sup>a</sup>           | 4(9.5)      | 5(11.9)   | 9(14.8)   | 10(16.9)  | 23(29.9)  | 15(18.5)  | 20(22.2)  | 29(27.6)  | 35(30.4)  | 46(34.8)  | 42(28.6)  | 48(32.4)  | 49(33.1)  | 335(26.9)   |
| CRIF, n (%)                        | 7(16.7)     | 14(33.3)  | 17(27.9)  | 16(27.1)  | 15(19.5)  | 17(21.0)  | 20(22.2)  | 22(21.0)  | 24(20.9)  | 23(17.4)  | 38(25.9)  | 28(18.9)  | 26(17.6)  | 267(21.4)   |
| NON-OPERATIVE, n (%) <sup>a</sup>  | 26(61.9)    | 18(42.9)  | 31(50.8)  | 28(47.5)  | 32(41.6)  | 41(50.6)  | 41(45.6)  | 37(35.2)  | 44(38.3)  | 48(36.4)  | 55(37.4)  | 56(37.8)  | 54(36.5)  | 511(40.2)   |
| IHM, n (%) <sup>a</sup>            | 4(9.5)      | 1(2.4)    | 1(1.6)    | 1(1.7)    | 4(5.2)    | 3(3.7)    | 1(1.9)    | 2(1.9)    | 5(4.3)    | 3(2.3)    | 2(1.4)    | 2(1.4)    | 2(1.4)    | 31(2.5)     |
| LOHS, median (IRQ)                 | 7.5(3-12.5) | 7(3-12)   | 6(2-10)   | 5(2-14)   | 7(3-14)   | 6(4-11)   | 7(3-11.2) | 7(3-13)   | 6(4-11)   | 6(3-11)   | 6(3-10)   | 4(2-9)    | 4(2-9)    | 6(3-11)     |
| <b>WOMEN WITHOUT T2DM</b>          |             |           |           |           |           |           |           |           |           |           |           |           |           |             |
| Arthroplasty, n (%) <sup>a,c</sup> | 204(12.7)   | 221(13.4) | 232(13.4) | 277(14.4) | 282(13.4) | 316(14.5) | 368(16.2) | 415(16.9) | 448(17.1) | 484(17.0) | 520(19.4) | 535(19.8) | 581(20.2) | 4883(16.1)  |
| ORIF, n (%) <sup>a,c</sup>         | 220(13.7)   | 262(16.1) | 300(17.3) | 354(18.4) | 434(20.7) | 526(24.1) | 552(24.3) | 715(29.1) | 770(29.4) | 900(31.5) | 838(31.2) | 915(33.9) | 970(33.7) | 7756(26.2)  |
| CRIF, n (%) <sup>a</sup>           | 457(28.5)   | 440(27.0) | 500(28.9) | 502(26.1) | 538(25.6) | 567(26.0) | 525(23.1) | 534(21.7) | 547(20.9) | 580(20.3) | 561(20.9) | 454(16.8) | 514(17.9) | 6719(22.1)  |
| NON-OPERATIVE, n (%) <sup>a</sup>  | 730(45.5)   | 711(43.6) | 711(41.1) | 803(41.8) | 851(40.6) | 786(36.1) | 835(36.8) | 812(33.0) | 874(33.4) | 906(31.7) | 785(29.2) | 813(30.1) | 830(28.8) | 10447(35.0) |
| IHM, n (%) <sup>a,c,c</sup>        | 10(0.6)     | 14(0.9)   | 20(1.2)   | 16(0.8)   | 24(1.1)   | 20(0.9)   | 19(0.8)   | 22(0.9)   | 15(0.6)   | 21(0.7)   | 16(0.6)   | 16(0.6)   | 19(0.7)   | 232(0.8)    |
| LOHS, median (IRQ) <sup>a</sup>    | 5(2-9)      | 5(3-10)   | 5(3-9)    | 5(3-9)    | 5(3-10)   | 6(3-10)   | 6(3-10)   | 6(3-10)   | 5(3-9)    | 5(3-9)    | 5(2-8)    | 5(2-8)    | 4(2-8)    | 5(3-9)      |
| <b>WOMEN WITH T2DM</b>             |             |           |           |           |           |           |           |           |           |           |           |           |           |             |
| Arthroplasty, n (%) <sup>a</sup>   | 37(16.0)    | 42(15.0)  | 52(16.7)  | 58(15.4)  | 70(16.7)  | 65(14.1)  | 93(16.8)  | 93(16.6)  | 124(18.0) | 137(19.2) | 118(16.6) | 145(20.2) | 184(23.6) | 1218(17.7)  |
| ORIF, n (%) <sup>a</sup>           | 35(15.2)    | 36(12.9)  | 50(16.1)  | 62(16.5)  | 73(17.5)  | 120(26.0) | 123(22.2) | 131(23.4) | 170(24.7) | 213(29.8) | 214(30.1) | 218(30.3) | 246(31.6) | 1691(24.1)  |
| CRIF, n (%) <sup>a</sup>           | 65(28.1)    | 80(28.6)  | 82(26.4)  | 107(28.5) | 109(26.1) | 119(25.8) | 137(24.8) | 133(23.8) | 145(21.1) | 143(20.0) | 164(23.0) | 145(20.2) | 117(15.0) | 1546(22.6)  |
| NON-OPERATIVE, n (%) <sup>a</sup>  | 99(42.9)    | 126(45.0) | 130(41.8) | 150(39.9) | 170(40.7) | 159(34.5) | 205(37.1) | 205(36.6) | 249(36.2) | 225(31.5) | 222(31.2) | 215(29.9) | 241(30.9) | 2396(34.6)  |
| IHM, n (%) <sup>a</sup>            | 4(1.7)      | 4(1.4)    | 5(1.6)    | 12(3.2)   | 10(2.4)   | 7(1.5)    | 7(1.3)    | 6(1.1)    | 7(1.0)    | 7(1.0)    | 10(1.4)   | 9(1.3)    | 8(1.0)    | 96(1.4)     |
| LOHS, median (IRQ) <sup>a</sup>    | 6(3-12)     | 7(4-12.7) | 6(3-12)   | 6(3-10)   | 7(4-10.2) | 7(4-11)   | 7(3-11)   | 6(4-11)   | 6(3-10)   | 5(3-9)    | 5(3-8)    | 5(2-9)    | 5(2-9)    | 6(3-10)     |

Arthroplasty Total or partial humerus replacement; ORIF: Open reduction of fracture with internal fixation ; CRIF: Close reduction of fracture with internal fixation; IHM: In-hospital mortality;;LOHS: Length of hospital stay.<sup>a</sup> P<0.05 for time trend. <sup>b</sup>. P<0.05 when comparing total values of study variables between men with and without T2DM. <sup>c</sup>. P<0.05 when comparing total values of study variables between women with and without T2DM. Statistical tests are the same than in Table 1 and 2.
